1 ***Leptospira* enrichment culture followed by ONT Nanopore sequencing allows better**  
2 **detection of *Leptospira* presence and diversity in water and soil samples.**

3 **Myranda Gorman<sup>1</sup>, Ruijie Xu<sup>2,3</sup>, Dhani Prakoso<sup>1, #2</sup>, Liliana C.M. Salvador<sup>2, 3, 4</sup>,**  
4 **Sreekumari Rajeev<sup>1\*</sup>**

5 <sup>1</sup>Department of Biomedical and Diagnostic Sciences, College of Veterinary Medicine, University  
6 of Tennessee, Knoxville, TN, 37996, USA;<sup>2</sup> Institute of Bioinformatics, <sup>3</sup>Center for the Ecology  
7 of Infectious Diseases, <sup>4</sup>Department of Infectious Diseases University of Georgia, Athens, GA,  
8 30602, USA, <sup>#2</sup>Professor Nidom Foundation, Surabaya, 60293, Indonesia-present address

9  
10  
11 **Author contributions**

12 Gorman: Methodology, Investigation, Formal analysis, Visualization, Writing

13 Prakoso; Methodology, Supervision, Resources, Formal analysis, Data curation, writing

14 Salvador: Bioinformatic analysis, Validation, Writing

15 Xu: Bioinformatic analysis, Software, Data curation, Visualization, Writing

16 Rajeev(PI): Project conception and administration, Supervision, Methodology, Resources,

17 Formal analysis, Writing

18

19

20

21

22 **Abstract (250 -300 words)**

23 **Background,**

24 Leptospirosis, a life-threatening disease in humans and animals, is one of the most widespread  
25 global zoonosis. Contaminated soil and water are the major transmission sources in humans and  
26 animals. Clusters of disease outbreaks are common during rainy seasons.

27 **Methodology/Principal Findings**

28 In this study, to detect the presence of *Leptospira*, we applied PCR, direct metagenomic  
29 sequencing, and enrichment culture followed by metagenomic sequencing on water and soil  
30 samples. Direct sequencing and enrichment cultures followed by PCR or sequencing effectively  
31 detected pathogenic and nonpathogenic *Leptospira* compared to direct PCR and 16S  
32 amplification-based metagenomic sequencing in soil or water samples. Among multiple culture  
33 media evaluated, Ellinghausen-McCullough-Johnson-Harris (EMJH) media containing  
34 antimicrobial agents was superior in recovering and detecting *Leptospira* from the environmental  
35 samples. Our results show that enrichment culture followed by PCR can be used to confirm the  
36 presence of pathogenic *Leptospira* in environmental samples. Metagenomic sequencing on  
37 enrichment cultures effectively detects the abundance and diversity of *Leptospira* spp from  
38 environmental samples.

39 **Conclusions/Significance**

40 The selection of methodology is critical when testing environmental samples for the presence of  
41 *Leptospira*. Selective enrichment culture improves *Leptospira* detection efficacy by PCR or  
42 metagenomic sequencing and can be used successfully to understand the presence and diversity  
43 of pathogenic *Leptospira* during environmental surveillance.

44 **Author Summary (150-200 words)**

45 Leptospirosis, a life-threatening disease in humans and animals, is one of the most widespread  
46 global zoonosis. Contaminated soil and water are major sources of transmission in humans and  
47 animals. For this reason, clusters of disease outbreaks are common during the rainy season. In  
48 this study, *Leptospira* enrichment cultures followed by PCR and sequencing detected pathogenic  
49 and nonpathogenic *Leptospira* in soil and water samples. The pathogenic and intermediate  
50 groups of *Leptospira* were more prevalent in soil samples tested. Metagenomic sequencing on  
51 enrichment culture is effective in detecting the abundance and diversity of various *Leptospira*  
52 *spp.* in environmental samples. Soil samples in proximity to water may be an ideal niche for  
53 *Leptospira* growth and survival and may be an appropriate sample of choice for testing.

54

## 55 **Introduction**

56 Many species of *Leptospira*, a spirochete bacterium that causes leptospirosis, are maintained in  
57 the renal tubules of numerous mammalian species and the environment (1). Leptospirosis is a  
58 life-threatening illness in humans, causing approximately 1 million cases and 60,000 deaths  
59 annually (2). A variety of mammals following *Leptospira* infection may become clinically ill or  
60 remain as asymptomatic renal reservoirs of infection. They shed bacteria through the urine and  
61 act as the source of infection to other animal hosts and environmental contamination (3).

62 Leptospirosis is endemic to tropical countries, and outbreaks occur during natural disasters  
63 where humans come into contact with the contaminated environment. The environmental route is  
64 the most common mode of *Leptospira* transmission in humans. The host and the environment  
65 interface play a major role in the epidemiology and transmission of *Leptospira* infection. In  
66 addition to sporadic outbreaks during recreational water activities, large clusters of outbreaks  
67 after severe rain and flooding are more common in tropical countries. Continuous changes in

68 climatic landscapes might increase the number of outbreaks occurring globally. A critical gap in  
69 knowledge on environmental persistence and cycling of *Leptospira* needs to be addressed (4). A  
70 number of studies have been conducted to investigate the level and type of *Leptospira* commonly  
71 found in environmental samples by applying multiple techniques.

72 The sensitivity and specificity of *Leptospira* detection in environmental samples can be  
73 complicated by the coexistence of chemical, physical and biological contaminants. Low levels of  
74 *Leptospira* present in the environmental sample among abundant contaminant microorganisms  
75 can also lead to false-negative results. Therefore, improvements in methods are needed for the  
76 accurate detection of *Leptospira* in environmental samples. Recently with the advent of Next  
77 Generation Sequencing (NGS) methods, the assessment of the microbial composition of  
78 environmental samples for disease surveillance has become a routine practice. For example,  
79 Oxford Nanopore Technologies (ONT) technology has been widely used for disease and  
80 environmental surveillance (5-8). We propose combining traditional selective culture methods  
81 with advanced sequencing could improve the *Leptospira* detection in the environmental samples.  
82 In this study, we evaluated multiple methods including selective enrichment culture, direct PCR,  
83 16S rRNA gene amplification based sequencing, direct metagenomic sequencing, and *Leptospira*  
84 enrichment culture followed by metagenomic sequencing to detect the presence of *Leptospira*  
85 DNA in environmental samples.

86

## 87 **Materials and methods**

### 88 **Sample Collection and processing**

89 We collected representative soil and water samples from a local creek where abundant human  
90 and animal activity was observed. We collected one liter of water and approximately 50 g of soil

91 from the damp edge of the creek from where water was collected in sterile containers and were  
92 transported to the laboratory on ice. After mixing the water thoroughly, we added 10 mL of  
93 Ellinghausen-McCullough-Johnson-Harris (EMJH) liquid medium (Becton Dickinson, Sparks,  
94 MD, USA) supplemented with Difco *Leptospira* Enrichment EMJH (Becton Dickinson, Sparks,  
95 MD, USA) media to the top of the water sample to enrich and attract *Leptospira*. After settling  
96 the sample for three hours, 200 mL of water from the top was collected and filtered with a 40 µm  
97 nylon filter. The filtrate was then divided into two 100 mL aliquots. We spiked one of the 100  
98 mL aliquots with *Leptospira interrogans* serovar Copenhageni ( $10^7$  bacteria per mL) to use as  
99 the control, and the second aliquot was designated as the test sample. The samples were further  
100 divided into 50 mL aliquots for PCR, sequencing, and culturing.

101 For the processing of soil samples, the 25 g of soil was divided between two flasks and then  
102 mixed with 100 mL of phosphate-buffered saline (PBS). After mixing thoroughly for five  
103 minutes, the sample was allowed to settle for thirty minutes. Then 100 mL of EMJH media was  
104 added to the top of the samples and allowed to settle overnight. A longer settling time was  
105 required to obtain a cleaner sample for inoculation. Once settled, 80 mL of supernatant from  
106 each flask was collected and filtered through a 40 µm nylon filter. The filtrate was then aliquoted  
107 into two 75 mL samples. We spiked one of the aliquots with *Leptospira interrogans* serovar  
108 Copenhageni ( $10^7$  bacteria per-mL) and designated it as "control". The non-spiked sample is  
109 designated as "test "sample. A schematic diagram showing soil and water processing is shown in  
110 supplemental figures 1 A and B.

#### 111 ***Leptospira* detection using direct PCR from water and soil**

112 The 50 mL aliquots of test (non-spiked) and control (spiked) samples were centrifuged at 4,000 x  
113 g for forty minutes. The pellet was collected and then reconstituted with 10 mL PBS. Then 1 mL

114 aliquots were pipetted into ten 1.5 mL collection tubes and stored at -20 °C. DNA was extracted  
115 from three replicates of the spiked and test samples using the Quick-DNA Fecal/Soil Microbe  
116 Miniprep Kit (Zymo Research, Irvine, CA, USA) following the manufacturer's protocol. The  
117 extracted DNA samples were then tested with Real-Time PCR targeting genes *LipL32*, *16S*  
118 *rRNA*, and *23S rRNA* to confirm the presence of *Leptospira* DNA (9-11) using a Q<sup>®</sup> Quantabio  
119 (Quantabio, Beverly, MA, USA) thermocycler. The cutoff for a positive sample was set at a Cq  
120 value of 40.

### 121 **16SrRNA gene-based metagenomic sequencing**

122 This procedure was performed following a recent publication describing monitoring fresh water  
123 for pathogens (12) Briefly, extracted DNA samples were amplified using the full length of *16S*  
124 *rRNA* gene primers with common primer binding sequences 27f and 1492r, attached to unique 24  
125 bp barcodes and nanopore motor protein tether sequence. The PCR was performed with 600 nM  
126 of each forward and reverse primer, 25 µL of Premix Taq DNA Polymerase (TakaraBio, Shiga,  
127 Japan), and a 10 µL DNA template in a 50 µL reaction. The amplification cycles used the  
128 following conditions 94 °C for 2 minutes, followed by 35 cycles of 94 °C for 30 seconds, 60 °C  
129 for 30 seconds, and 72 °C for 45 seconds, with final elongation at 72 °C for 5 minutes. The  
130 amplicons from the PCR step were purified using NucleoSpin Gel and PCR Clean-up (Macherey  
131 Nagel, Duren, Germany) following the manufacturer's protocol. The barcoded amplicon samples  
132 were pooled in equimolar ratios, and library preparation and sequencing were conducted using  
133 Ligation Sequencing Kit SQK-LSK-109 (Oxford Nanopore Technologies, Oxford, UK) on the  
134 MinION (Oxford Nanopore Technologies, Oxford, UK) sequencing platform following the  
135 manufacturer's instructions.

136

137 ***Metagenomic sequencing directly from the environmental samples***

138 The samples were spun down at 4,000 x g for forty minutes, and the supernatant was discarded,  
139 leaving a pellet in 10 mL of supernatant. After thorough mixing, 1 mL was aliquoted into ten 1.5  
140 mL microcentrifuge tubes, then centrifuged at 14,000 x g for three minutes, and the supernatant  
141 was removed from each tube, leaving 200  $\mu$ L with the pellet. DNA was extracted using Quick-  
142 DNA Fecal/Soil Microbe Miniprep Kit (Zymo Research, Irvine, CA, USA) according to the  
143 manufacturer's instructions. The extracted DNA from water and soil underwent a further  
144 purification step using Monarch<sup>®</sup> PCR & DNA Cleanup Kit (New England Biolabs, Ipswich,  
145 MA, USA). DNA Library preparation was conducted using Native barcoding genomic DNA Kit  
146 SQK-LSK 109 combined with EXP-NBD104 (Oxford Nanopore Technologies, Oxford, UK)  
147 following the manufacturer's instructions. After the end repair step, DNA from samples was  
148 barcoded and pooled in equimolar amounts to make one library, followed by adapter ligation and  
149 sequencing for approximately 48 hours on the MinION (Oxford Nanopore Technologies,  
150 Oxford, UK) sequencing platform.

151 ***Leptospira enrichment culture, followed by PCR and metagenomic sequencing***

152 We tested multiple media and antimicrobial combinations to enrich and grow *Leptospira* from  
153 environmental samples. We used four commonly used *Leptospira* culture media Stuart, Korthof,  
154 Fletcher, and Ellinghausen–McCullough–Johnson–Harris (EMJH) media. We tested each of  
155 these media with (plain) and without the addition of antimicrobials, 5-Fluorouracil (5-FU) and an  
156 antimicrobial cocktail (STAFF) to control the growth of competing bacteria in the cultures (13).  
157 We inoculated 500  $\mu$ L of the processed water and soil to each of these media. A schematic  
158 representation of the inoculation of soil and water is shown in Figure 1.

159 **Figure 1: A schematic representation of sample inoculation for culture**

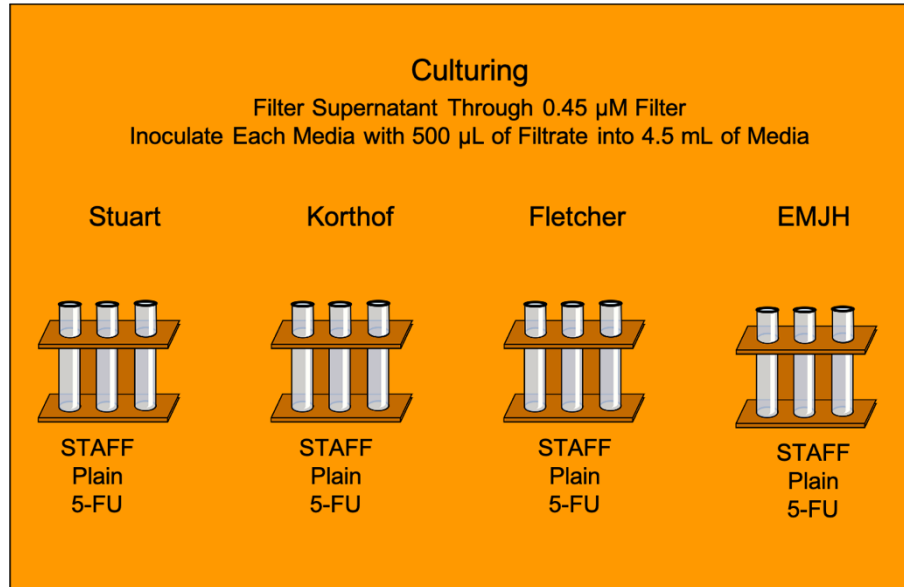

160

161

162 The cultures were then incubated in a 29 °C incubator for four weeks, monitored at 24 hours, 72

163 hours, and then once a week for four weeks using dark field microscopy (DFM). The samples

164 with the presence of organisms exhibiting *Leptospira*-like motility and morphology were

165 presumptively identified as positive for *Leptospira* and scored from 0 to +4 rating system based

166 on the number of spirochetes present (Table 1).

167 **Table 1: The scoring system used in this study to evaluate cultures**

| Scoring | The relative number of <i>Leptospira</i> -like organisms under DFM |
|---------|--------------------------------------------------------------------|
| 0       | None seen                                                          |
| +1      | Less than 25                                                       |
| +2      | Between 25 and 50                                                  |
| +3      | Between 50 and 100                                                 |
| +4      | More than 100/too numerous to count                                |

168

169 The presence and level of other contaminating bacteria were also recorded at each time point of

170 evaluation. After four weeks of incubation and monitoring, 1 mL from each culture

171 presumptively identified to contain *Leptospira*-like bacteria were collected, and DNA was



172 extracted (Zymo Quick-DNA Miniprep kit, Zymo Research, Irvine, CA, USA). The DNA was  
173 then tested by PCR using *LipL32*, *16S rDNA*, and *23S rDNA* primers as described above.  
174 To evaluate the composition and *Leptospira* diversity of the culture samples, we pursued  
175 metagenomic sequencing using DNA extracted from culture samples. A composite of positive  
176 samples of culture and soil was used to reduce the cost of testing. Briefly, extracted DNA was  
177 purified using SparQ PureMag Beads (Quantabio, Beverly, MA, USA) following the instruction  
178 from the manufacturer. The Native barcoding genomic DNA Kit SQK-LSK 109 combined with  
179 EXP-NBD104 (Oxford Nanopore Technologies, Oxford, UK) was used for library preparation.  
180 The samples underwent end-repair, barcode ligation for multiplexing, and adapter ligation and  
181 sequencing. The DNA sequencing was conducted using the MinION (Oxford Nanopore  
182 Technologies, Oxford, UK) sequencing platform for approximately 24 hours.

### 183 Sequence Analysis

184 All scripts used for sequence data analysis is available at:  
185 [https://github.com/rx32940/Environmental\\_Lepto\\_detection](https://github.com/rx32940/Environmental_Lepto_detection). All samples were base called using  
186 Guppy v. 6.1.1 with High Accuracy setting (<https://community.nanoporetech.com>). Samples  
187 were demultiplexed using Porechop v. 0.2.4. (<https://github.com/rrwick/Porechop>). To trim  
188 customized barcodes and adapters from each read during demultiplexing, customized barcodes  
189 and adapters were added to Porechop's Adapter.py file before demultiplexing. The command '—  
190 discard\_middle" was specified to remove chimeric reads attached by two different barcodes. The  
191 quality of the filtered reads was assessed using NanoStat v 1.5.0 (14) and visualized using Pistis  
192 v 0.3.4 (<https://github.com/mbhall88/pistis>).

## 193 **Microbial composition profiling and *Leptospira* classification from 16S dataset**

194 Since the length of bacterial 16S rRNA is around 1.5 kbp<sup>1</sup>, reads smaller than 1.4 kbp and larger  
195 than 1.6 kbp were filtered using NanoFilt v. 2.8.0 (14) to remove potential existing  
196 contaminations. To classify each read's microbial taxon, each sample's filtered reads were  
197 mapped against SILVA v. 138.1 16S rRNA database (15) using Minimap2 v 2.17 (16) with the  
198 recommended option for Nanopore reads "-ax map-ont". Statistics for the percentage of reads  
199 mapped to the database were assessed using the "stat" function in Samtools v.1.10 (17). Mapped  
200 Bam files were converted to Bed format using "sam2bed" function in BEDOPS v 2.4.39 (18) for  
201 the downstream analysis. Microbial composition and abundance for each sample were analyzed  
202 using R. Reads mapped to more than one microbial taxa were assigned to the lowest common  
203 ancestor (LCA) of all mapped taxa. Reads that could not be assigned to at least a family-level  
204 taxon were removed from the downstream analysis due to low discrimination. Reads classified  
205 under all the taxa belong to the same bacterial family were summarized to obtain each sample's  
206 microbial composition at the family level. The microbial composition for each sample was  
207 summarized and visualized using "dplyr" (<https://dplyr.tidyverse.org>,  
208 <https://github.com/tidyverse/dplyr>)  
209 and "ggplot2" packages in R (<https://ggplot2.tidyverse.org>)  
210 All reads mapped under phylum *Spirochaete* were extracted from each sample's sequences file  
211 using the "subseq" function in SEQTK v. 1.2 (<https://github.com/lh3/seqtk>) using read ID's.  
212 Extracted *Spirochaetota* reads were aligned with all *Leptospira* 16S rRNA sequences deposited  
213 in NCBI using MUSCLE v 3.8.0(19) and built neighboring joining (NJ) phylogeny using the "-  
214 maketree" option in MUSCLE v 3.8.0 for genetic relatedness evaluation. NJ phylogenies were  
215 visualized using the "ggtree" package in R(20).

216 **Microbial composition profiling and *Leptospira* classification and identification from direct**  
217 **Sequencing and Sequencing from the enrichment culture**

218 Each sample's microbial composition was profiled using Kraken2 v. 2.0.9 (21) with the  
219 maxikraken2 database ([https://lomanlab.github.io/mockcommunity/mc\\_databases.html](https://lomanlab.github.io/mockcommunity/mc_databases.html)) using  
220 the default settings. Profiling results of all samples were combined into a single file using  
221 KrakenTools v 1.2 (<https://github.com/jenniferlu717/KrakenTools>). Microbial reads classified  
222 under each taxon were analyzed and summarized in R using "dplyr" package  
223 (<https://dplyr.tidyverse.org>, <https://github.com/tidyverse/dplyr>)  
224 and visualized using "ggplot2" (<https://ggplot2.tidyverse.org>) package. All reads mapped under  
225 *Leptospira* taxa were subset from microbial profiles of each sample to visualize the relative  
226 percentage of *Leptospira* species identified from each sample.

227

228 **Results**

229 **Direct PCR results from environmental samples**

230 For the direct real-time PCR, both the test and spiked (control) water and soil samples were  
231 tested using the *Leptospira* specific *16S rRNA*, *Lip132*, and *23S rRNA* gene markers. The *16S*  
232 *rRNA* gene was amplified from all the samples, however, Cq values were high in the test  
233 samples suggesting low levels of *16S rDNA* (Figure 2). *Lip132* amplification product was  
234 detected only in the control samples and not in the test samples. The amplification pattern of the  
235 *23S rRNA* gene was inconsistent and was detected in the soil test and water control samples, but  
236 not in the soil control and water test samples. PCR results are shown in Figure 2

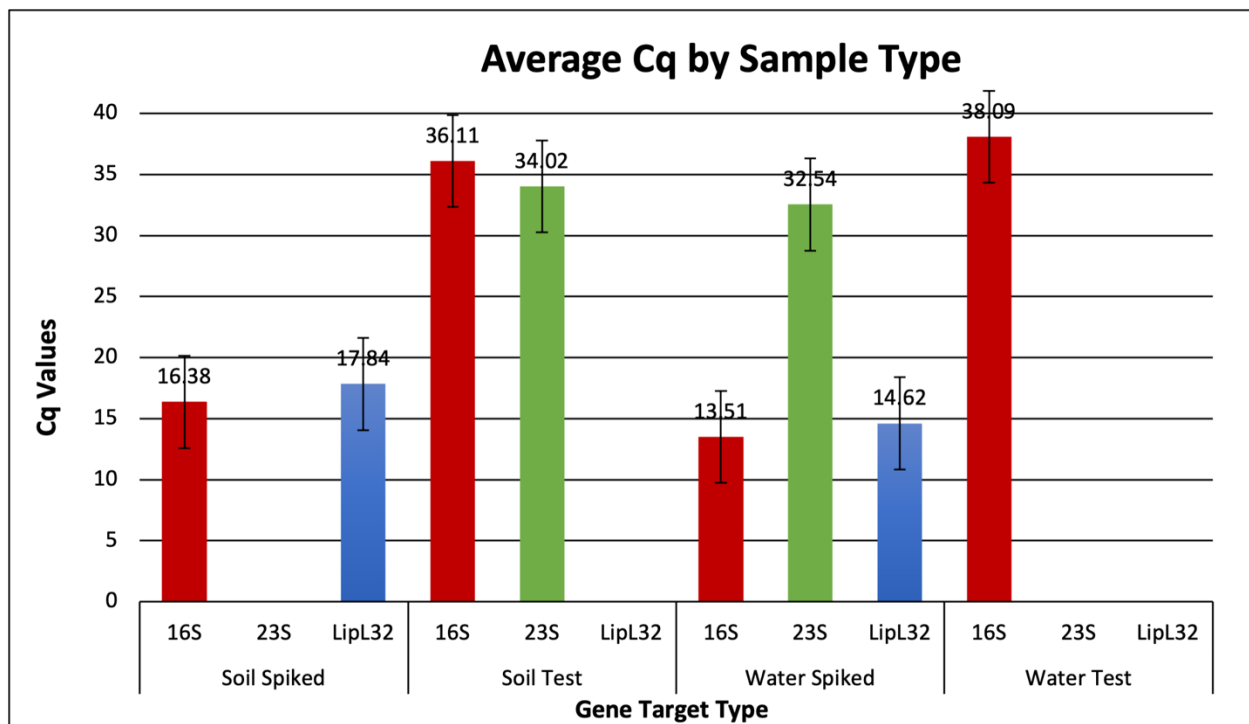

237

238 **Figure 2: Average Cq values for the water and soil samples that were directly tested with**  
239 **Real-Time PCR. Spiked soil and water samples used as the control for testing and are the**  
240 **only samples where *LipL32* genes were detected. All samples displayed the presence of *16S***  
241 ***rRNA* gene, but only the soil test and water spiked samples had *23SrRNA* genes detected in**  
242 **their sample.**

243

#### 244 **Culture results**

245 The soil and water samples were cultured in four different types of media with microbial  
246 inhibitor combinations. The presence and levels of organisms with morphology compatible with  
247 *Leptospira* were recorded with a 0 to +4 ordinal system (Table 1). The cultures with selective  
248 antimicrobial inhibitors demonstrated large and earlier increases in bacterial organisms with  
249 morphology and motility compatible with *Leptospira* when observed under the DFM. Overall,  
250 EMJH cultures with 5-FU or STAFF were favorable for *Leptospira* growth for the water test

251 group. For the soil test samples, the culture results were more variable. The usage of selective  
 252 antimicrobials in the cultures did not have as much of a visible impact on the growth of  
 253 *Leptospira* in the soil samples. Overall, Fletcher and EMJH media demonstrated favorable  
 254 growth for the soil samples, with EMJH performing marginally better than the Fletcher media.  
 255 All water test and soil test cultures were tested using real-time PCR to confirm the presence of  
 256 *Leptospira*. For the 23S rRNA gene marker, all soil and water samples were positive with  
 257 consistently low Cq values. The cultured test water samples were positive for *LipL32* and *16S*  
 258 rRNA gene markers. The Cq values for the water samples were consistently around 30 to 35,  
 259 demonstrating lower levels of *LipL32* and *16S rRNA* in the water samples compared to the  
 260 cultured soil test samples. The cultured soil test samples had lower Cq values for the *LipL32* and  
 261 *16S rRNA* gene markers, indicating higher levels of DNA in the soil samples. The growth pattern  
 262 of *Leptospira*-like organisms in various cultures are shown in Supplemental Figure 2

### 263 Sequencing results

264 The details of results from all sequencing methods are shown in Table 2

265 **Table 2: Overall read classification from all the sequencing methods used in this study**

266 <sup>1</sup>-Culture enrichment and metagenomic sequencing; <sup>2</sup>- Direct metagenomic sequencing; <sup>3</sup>-  
 267 **16S amplification-based sequencing**

| Source             | Total reads | Classified | Chordate | Unclassified | Microbial | Bacterial | Accession |
|--------------------|-------------|------------|----------|--------------|-----------|-----------|-----------|
| Water <sup>1</sup> | 233,994     | 69.20%     | 0.01%    | 30.80%       | 69.20%    | 69.10%    |           |
| Soil <sup>1</sup>  | 237,064     | 65.60%     | 0.00%    | 34.40%       | 65.60%    | 65.50%    |           |
| Water <sup>2</sup> | 7,425       | 83.10%     | 0.05%    | 16.90%       | 83.10%    | 82.80%    |           |
| Soil <sup>2</sup>  | 438,190     | 90.20%     | 0.01%    | 9.84%        | 90.20%    | 90%       |           |
| Water <sup>3</sup> | 78,756      | 99.38%     | 0.00%    | 0.62%        | 0.00%     | 99.38%    |           |
| Soil <sup>3</sup>  | 68,056      | 99.66%     | 0.00%    | 0.34%        | 0.00%     | 99.66%    |           |

268

269 ***Microbial composition profiling and Leptospira classification from 16S dataset***

270 A very low number of reads were classified under the phylum taxon "Spirochaetota" in the water  
271 (1 read) and soil (9 reads) samples when 16S rRNA gene sequence dataset was analyzed. The  
272 single reads identified in the water sample were closely clustered with the reference *16S rRNA*  
273 sequences of two pathogenic *Leptospira spp.*, *L. interrogans* and *L. kirschneri*. For the 9 reads  
274 obtained from the soil samples, reads were clustered into two separate clusters on the NJ  
275 phylogeny. The first cluster was closer to the *16S rRNA* sequences of saprophytic and other  
276 environmental *Leptospira* species, while the second cluster was found genetically distant from  
277 all *Leptospira* species but closely related to the 16S rRNA of *Leptonema illini* (Supplemental  
278 figure 3)

279

280 ***Microbial composition profiling and Leptospira classification and identification from direct***  
281 ***sequencing***

282 A wide range of potentially pathogenic and water-associated microbial sequences were detected  
283 from directly sequenced soil (1,438 unique genera) and water (371 unique genera) samples.  
284 From those, 102 reads (soil: 67 reads; water: 34 reads) from 12 different *Leptospira sp.* were  
285 identified from soil and water samples. Saprophytic *Leptospira spp.* reads were identified in both  
286 soil and water samples. Interestingly, pathogenic and intermediate groups of *Leptospira spp.*  
287 reads were identified in the soil sample with low coverage. Only three reads of the pathogenic  
288 *Leptospira sp.* (1 read from *L. interrogans*; 1 from *L. alstonii*; 1 read from *L. santarosai*) and one  
289 read of the intermediate *Leptospira sp.* (*L. neocaledonica*) were identified from the soil sample.  
290 In addition, around 27% and 12% of *Leptospira* reads identified in the soil and water samples

291 could not be classified at the species level. Figure 3 summarizes microbial classification profiles  
292 of direct sequencing results.

293

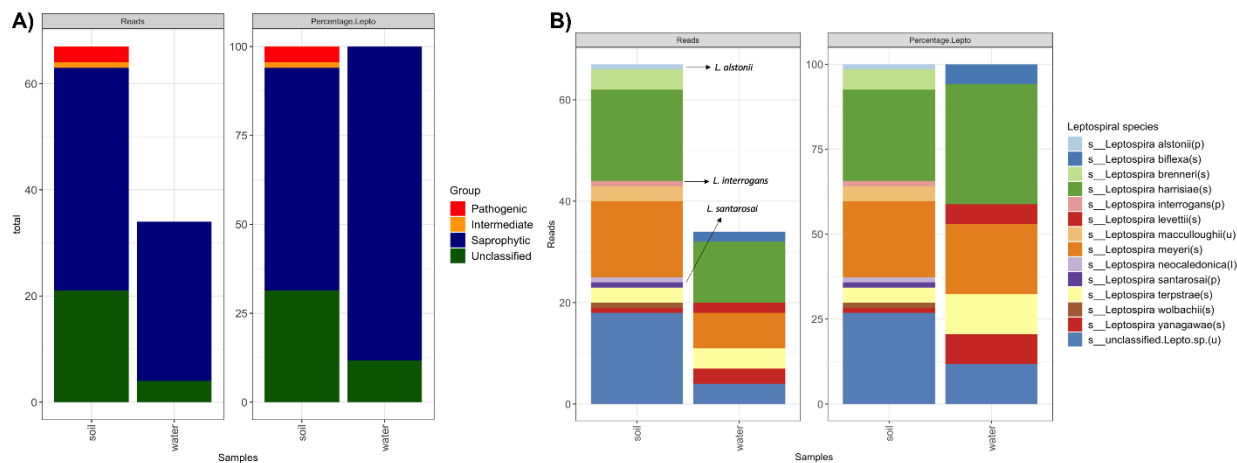

294

295

296 **Figure 3. *Leptospira* composition profiles for directly sequenced soil and water samples**

297 **3A. Proportion of *Leptospira* clades identified; 3B. *Leptospira* species-level classification.**

298 **Pathogenic species identified in the soil sample is labeled in the figure. The Group of each**

299 ***Leptospira* species is annotated in the parenthesis behind species names in the figure legend**

300 **(p: Pathogenic; i: Intermediate; s: saprophytic; u: Unclassified).**

301

302 **Microbial profiling of the enrichment culture**

303 We pooled positive culture samples from water and soil, prepared a composite sample for each,

304 and proceeded with sequencing. For samples sequenced with culture enrichment, 1,325 unique

305 microbial genera were identified across all samples, with over 60% of all reads classified as

306 bacteria (Table 2). Ninety-eight percent of 30,453 total reads from soil, and 99% of 127,940 total

307 reads from water were classified under *Leptospira*. In total, 34 unique pathogenic and

308 nonpathogenic *Leptospira spp.* were identified in the enrichment cultures. It is interesting to note

309 that 98% and 99% of leptospiral reads in the soil and water samples were classified under either  
 310 a saprophytic species or an unclassified species. Eleven pathogenic species in the soil from 551  
 311 (1.8%) reads and 13 pathogenic species in the water from 859 (0.7%) total reads were identified.  
 312 In addition, nine intermediate species in soil from 33 reads (0.1%) and ten intermediate species  
 313 in water from 141 reads (0.1%) were identified. Figure 4 summarizes microbial classification  
 314 profiles of direct sequencing results.  
 315

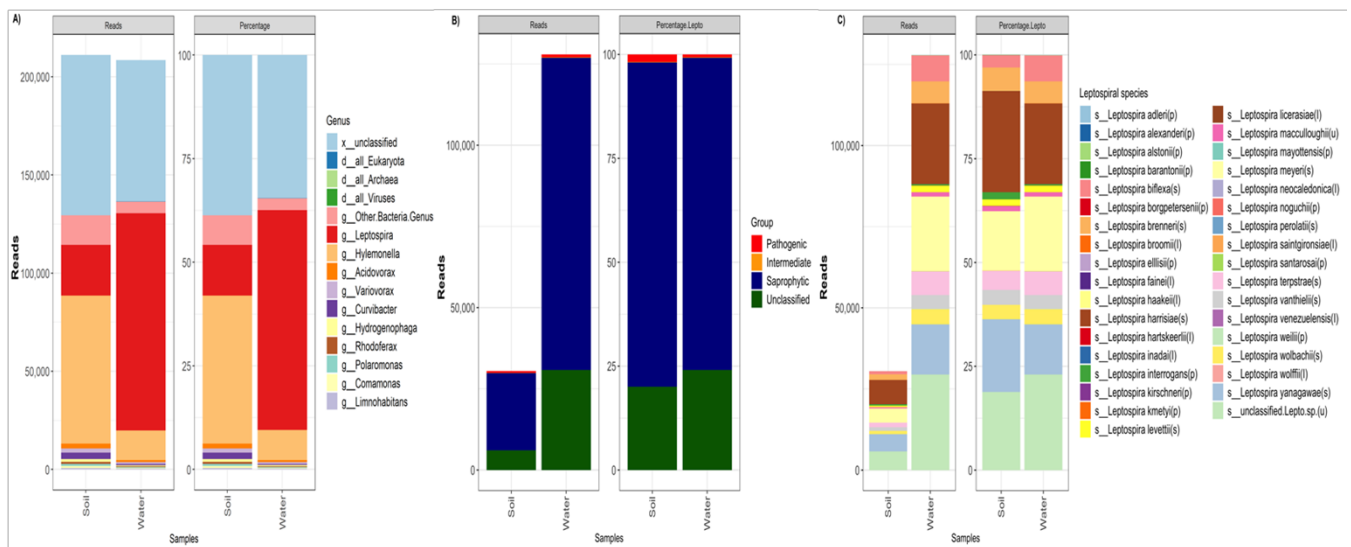

316  
 317 **Figure 4. Microbial classification summary statistics of pooled enrichment cultures of soil**  
 318 **and water samples. The number and percentage of reads classified under different**  
 319 ***Leptospira* species in enrichment cultures sequenced are presented. Group of each**  
 320 ***Leptospira* species is annotated in the parenthesis behind species names (p: Pathogenic; i:**  
 321 **Intermediate; s: Saprophytic; u: Unclassified). 4A: General microbial profile, 4B:**  
 322 **Proportion of *Leptospira* clades identified 4C: *Leptospira* species-level classification.**

323

324 **Discussion**



325 There is a critical knowledge gap on various aspects of environmental presence, survival, and  
326 persistence of *Leptospira*. Exposure to contaminated soil and water is a major risk factor for  
327 acquiring leptospirosis in humans and animals. The maintenance of bacteria in the soil and water  
328 and its dispersal during extreme weather events may increase the number of cases during such  
329 events. Therefore, this work was focused on evaluating and improving *Leptospira* detection from  
330 environmental samples. In this study, we observed variations in *Leptospira* detection when  
331 different techniques were applied to water and soil samples.

332 The original *Leptospira* taxonomy divided this genus into two species, pathogenic *L. interrogans*  
333 and saprophytic *L. biflexa* based on phenotypic characteristics (1). These two species had  
334 numerous serovars based on their serologic reactivity. Later DNA hybridization studies revealed  
335 multiple pathogenic species that included group 1 (pathogenic) and group 2 (intermediately  
336 pathogenic). Whole-genome sequencing projects further characterized *Leptospira* genomes  
337 revealing many genetic attributes that correlate with virulence and pathogenicity (22-24). The  
338 presence and the high diversity of *Leptospira* species from soil and water samples from a single  
339 location were confirmed in our study. The presence of saprophytic *Leptospira* sequences was  
340 confirmed in both water and soil samples in larger proportions. The presence of the pathogenic  
341 and intermediate groups was primarily observed in the soil. Amplification of 16S rRNA and  
342 sequencing is a very common method used for microbial profiling of environmental samples,  
343 however, our data shows that 16S rRNA-based metagenomics may not detect the low-level  
344 presence of *Leptospira* in environmental samples. The technique we applied, the enrichment  
345 culture followed by metagenomic sequencing, improved the detection of a diverse set of  
346 pathogenic and nonpathogenic *Leptospira* in the soil and water samples. Our findings agree with  
347 many recent investigations on environmental samples identifying increased diversity of

348 *Leptospira* species in environmental samples (25, 26). These findings emphasize the need to  
349 explore the environment as a potential reservoir of pathogenic *Leptospira*. It is important to note  
350 that when enrichment cultures followed by sequencing were applied, a diverse population of  
351 *Leptospira* could be observed from soil and water samples from a single site. A recent systematic  
352 review also supported the presence of *Leptospira* in soil and its dispersion during extreme events  
353 of soil disturbance (27). The bacteria may utilize the environmental conditions in the damp soil  
354 and may undergo low-level proliferation enabling their persistence in the soil and subsequent  
355 transmission to susceptible hosts and hence reservoir animal kidneys are probably not the only  
356 source of contamination.

357 Analyzing environmental samples can be challenging since the sample has increased diversity of  
358 organisms present in varying amounts. To study a specific group of organisms in that sample,  
359 such as *Leptospira*, methods such as filtration, amplification, and selective culturing can be  
360 implemented to remove other environmental organisms that may out-compete and prevent the  
361 identification of target bacteria.

362 A variety of methods are used to detect *Leptospira* from environmental samples. PCR is a widely  
363 used method, and multiple gene targets have been evaluated (28). We used three different types  
364 of PCR with variable outcomes. PCR directly from soil or water samples did not confirm the  
365 presence of pathogenic *Leptospira*. Growing *Leptospira* in culture can be challenging. Our  
366 enrichment culture procedure evaluated various media and antimicrobial supplements following  
367 sequential filtration and sedimentation for the recovery and detection of *Leptospira*. In previous  
368 studies, filtration methods were utilized to accomplish different goals. Some studies used filters  
369 that had a large pore size of 0.7  $\mu\text{m}$  to remove or capture bacteria and other studies used filters  
370 that were 0.2  $\mu\text{m}$  to capture *Leptospira* on the filter (12, 29). Our methodology used a double

371 filtration system to improve the efficacy. First, we used a 40  $\mu\text{m}$  filter to catch large debris that  
372 could block the smaller filter and impede filtration. Then the resulting filtrate was allowed to  
373 pass through a 0.45  $\mu\text{m}$  filter to remove larger bacteria, assuming that *Leptospira* with a width of  
374 0.1  $\mu\text{m}$  would pass through the filter. This double filtration method aimed to concentrate  
375 *Leptospira* in the samples, increase the chance of recovery, and reduce contamination. Unlike the  
376 direct PCR, culture enrichment followed by PCR could detect *Leptospira* DNA in these samples.  
377 *Leptospira* culture in the presence of selective antimicrobial inhibitors might have allowed the  
378 replication of *Leptospira* while inhibiting major contaminants. Culture enrichment followed by  
379 sequencing allowed a better understanding of the diversity of *Leptospira* species present in these  
380 samples. Therefore, the sequential application of traditional and molecular methods will improve  
381 the pathogen detection and characterization from environmental samples.

382 Out of the three PCR targets, we used the *I6S* primers to amplify DNA from pathogenic and  
383 nonpathogenic *Leptospira*, *Lipl32* primers to amplify DNA from pathogenic *Leptospira*, and 23S  
384 primers to amplify DNA from nonpathogenic *Leptospira*. In our study, the direct PCR screening  
385 only detected an extremely low amount of saprophytic *Leptospira* DNA from the soil sample and  
386 none from the water. Intrinsic differences in amplification efficiencies and the level of original  
387 target sequences present in the samples might be a factor that contributed to the lack of detection  
388 by our direct PCR methods.

389 An experimental study on *Leptospira* survival in soil and water microcosms suggested the  
390 inability of *Leptospira* to multiply in environmental sites and the environment may be a  
391 temporary carrier for the bacteria shed from animal kidneys (30). Interestingly, a recent study  
392 experimentally evaluated the suitability of water-logged soil as a medium for *Leptospira* growth  
393 (31). They concluded that *Leptospira* can remain in the soil for longer periods in a resting state

394 and proliferate when they come into contact with water. In bodies of water where the soil has not  
395 been recently disturbed, pathogenic *Leptospira* may be present but at DNA levels not detectable  
396 by direct qPCR. The limit of detection in many studies are based on spiked samples; however,  
397 heterogeneity of environmental samples may affect the sensitivity of detection. A detection limit  
398 of  $10^1$  to  $10^2$  leptospores/mL of blood is suggested, but a higher level of *Leptospira* may be  
399 required for environmental samples due to a higher level of PCR inhibition, competing bacteria,  
400 and DNA degradation from environmental contaminants that might be present in these samples  
401 (27, 32, 33). It is worth noting that direct PCR from environmental samples does not validate the  
402 presence of viable *Leptospira*. In contrast, enrichment culture followed by PCR or sequencing  
403 allows the confirmation of viable bacteria and is potentially a better method for assessing  
404 environmental maintenance and transmission risk.

405 Implementing 16S rRNA amplification allows bacterial DNA in samples to be selectively  
406 amplified. This is especially useful in environmental samples, since there can be contamination.  
407 Recently, a cost-effective workflow for microbiological profiling using targeted nanopore  
408 sequencing of freshwater detected the presence of *Leptospira* (12). We also used a similar  
409 method described in this study, and 16S rRNA was amplified using barcoded custom primers  
410 followed by Nanopore sequencing. Surprisingly, only a few reads from *Leptospira* spp. were  
411 detected by these methods. This could be attributed to the nature of pathogenic *Leptospira* and its  
412 propensity to maintain at low levels in the environment or the larger more abundant  
413 environmental DNA crowding out pathogenic *Leptospira* strains limiting the number of reads  
414 obtained during sequencing. In our study, the direct sequencing from the samples resulted in a  
415 greater number of reads compared to 16S rRNA sequencing workflow and allowed better  
416 detection of pathogenic *Leptospira*.

417 Next-generation sequencing allows us to study the abundance and diversity of microbial  
418 populations in environmental samples. Long-read sequencing has allowed us to study the  
419 complete genomes of organisms that are not culturable or found in association with other  
420 organisms in the environment (34). With this technology, the diversity of environmental samples  
421 could be captured since the DNA of organisms could be analyzed despite the size or presence of  
422 a conserved strain of DNA (35). The DNA of bacteria, protozoa, and animals could all be  
423 sequenced from one sample to help investigate the microbiome found in soil, water, and  
424 biological fluids. Previously pure, cultured samples had to be used to analyze the genome of an  
425 organism, but new metagenomic sequencing technology allows complex contaminated samples  
426 to be analyzed. Commercial platforms such as Illumina, Ion Torrent are widely used for this  
427 purpose based on short-read sequencing technology, and ONT Nanopore and PacBio sequencing  
428 systems use long-read sequencing methods. ONT nanopore method offered us a cost-effective  
429 and user-friendly platform without the need for robust equipment. One of limitation of this  
430 system is that the pores can become clogged and create a physical barrier. Larger and more  
431 prevalent DNA will pass through the pores and possibly clog the pore before the less prevalent  
432 genomes can be sequenced and subsequently may lower the sequence output.

433 Based on our findings, we propose the enrichment culture followed by real time PCR as a point  
434 of care test for water surveillance of *Leptospira* presence in the environment and the enrichment  
435 culture followed by sequencing to understand the diversity of *Leptospira* species present in these  
436 samples. Our future studies will attempt to evaluate optimal sample volume, incubation time, and  
437 cost-effectiveness for routine environmental surveillance procedures for the detection and  
438 characterization of *Leptospira*. We also anticipate on isolating mixed cultures of *Leptospira*

439 obtained in this study to purity and further characterize the pathogenic species obtained in this  
440 study.

#### 441 **Acknowledgements**

442 We would like to thank the Boheringer and Ingelheim Veterinary Summer Scholar program for  
443 providing the opportunity for Miranda Gorman to conduct this research over the summer and  
444 UT College of Veterinary Medicine for funding support.

445

#### 446 **References**

- 447 1. Levett PN. Leptospirosis. *Clin Microbiol Rev.* 2001;14(2):296-326.
- 448 2. Costa F, Hagan JE, Calcagno J, Kane M, Torgerson P, Martinez-Silveira MS, et al. Global  
449 Morbidity and Mortality of Leptospirosis: A Systematic Review. *PLoS Negl Trop Dis.*  
450 2015;9(9):e0003898.
- 451 3. Ellis WA. Animal leptospirosis. *Curr Top Microbiol Immunol.* 2015;387:99-137.
- 452 4. Barragan V, Olivas S, Keim P, Pearson T. Critical Knowledge Gaps in Our Understanding  
453 of Environmental Cycling and Transmission of *Leptospira* spp. *Appl Environ Microbiol.*  
454 2017;83(19).
- 455 5. Baldan R, Cliff PR, Burns S, Medina A, Smith GC, Batra R, et al. Development and  
456 evaluation of a nanopore 16S rRNA gene sequencing service for same day targeted treatment  
457 of bacterial respiratory infection in the intensive care unit. *J Infect.* 2021;83(2):167-74.
- 458 6. Charalampous T, Kay GL, Richardson H, Aydin A, Baldan R, Jeanes C, et al. Nanopore  
459 metagenomics enables rapid clinical diagnosis of bacterial lower respiratory infection. *Nat*  
460 *Biotechnol.* 2019;37(7):783-92.
- 461 7. Nkongolo KK, Narendrula-Kotha R. Advances in monitoring soil microbial community  
462 dynamic and function. *J Appl Genet.* 2020;61(2):249-63.
- 463 8. Ciuffreda L, Rodríguez-Pérez H, Flores C. Nanopore sequencing and its application to the  
464 study of microbial communities. *Comput Struct Biotechnol J.* 2021;19:1497-511.
- 465 9. Backstedt BT, Buyuktanir O, Lindow J, Wunder EA, Jr., Reis MG, Usmani-Brown S, et al.  
466 Efficient Detection of Pathogenic Leptospire Using 16S Ribosomal RNA. *PLoS One.*  
467 2015;10(6):e0128913.
- 468 10. Woo TH, Smythe LD, Symonds ML, Norris MA, Dohnt MF, Patel BK. Rapid distinction  
469 between *Leptospira interrogans* and *Leptospira biflexa* by PCR amplification of 23S ribosomal  
470 DNA. *FEMS Microbiol Lett.* 1997;150(1):9-18.
- 471 11. Stoddard RA. Detection of pathogenic *Leptospira* spp. through real-time PCR (qPCR)  
472 targeting the LipL32 gene. *Methods Mol Biol.* 2013;943:257-66.
- 473 12. Urban L, Holzer A, Baronas JJ, Hall MB, Braeuninger-Weimer P, Scherm MJ, et al.  
474 Freshwater monitoring by nanopore sequencing. *Elife.* 2021;10.

- 475 13. Chakraborty A, Miyahara S, Villanueva SY, Saito M, Gloriani NG, Yoshida S. A novel  
476 combination of selective agents for isolation of *Leptospira* species. *Microbiol Immunol.*  
477 2011;55(7):494-501.
- 478 14. De Coster W, D'Hert S, Schultz DT, Cruts M, Van Broeckhoven C. NanoPack: visualizing  
479 and processing long-read sequencing data. *Bioinformatics.* 2018;34(15):2666-9.
- 480 15. Quast C, Pruesse E, Yilmaz P, Gerken J, Schweer T, Yarza P, et al. The SILVA ribosomal  
481 RNA gene database project: improved data processing and web-based tools. *Nucleic Acids Res.*  
482 2013;41(Database issue):D590-6.
- 483 16. Li H. Minimap2: pairwise alignment for nucleotide sequences. *Bioinformatics.*  
484 2018;34(18):3094-100.
- 485 17. Li H, Handsaker B, Wysoker A, Fennell T, Ruan J, Homer N, et al. The Sequence  
486 Alignment/Map format and SAMtools. *Bioinformatics.* 2009;25(16):2078-9.
- 487 18. Neph S, Kuehn MS, Reynolds AP, Haugen E, Thurman RE, Johnson AK, et al. BEDOPS:  
488 high-performance genomic feature operations. *Bioinformatics.* 2012;28(14):1919-20.
- 489 19. Edgar RC. MUSCLE: multiple sequence alignment with high accuracy and high  
490 throughput. *Nucleic Acids Res.* 2004;32(5):1792-7.
- 491 20. Yu G, Smith DK, Zhu H, Guan Y, Lam TT-Y. ggtree: an r package for visualization and  
492 annotation of phylogenetic trees with their covariates and other associated data. *Methods in*  
493 *Ecology and Evolution.* 2017;8(1):28-36.
- 494 21. Wood DE, Lu J, Langmead B. Improved metagenomic analysis with Kraken 2. *Genome*  
495 *Biol.* 2019;20(1):257.
- 496 22. Fouts DE, Matthias MA, Adhikarla H, Adler B, Amorim-Santos L, Berg DE, et al. What  
497 Makes a Bacterial Species Pathogenic?: Comparative Genomic Analysis of the Genus *Leptospira*.  
498 *PLoS Negl Trop Dis.* 2016;10(2):e0004403.
- 499 23. Vincent AT, Schiettekatte O, Goarant C, Neela VK, Bernet E, Thibeaux R, et al. Revisiting  
500 the taxonomy and evolution of pathogenicity of the genus *Leptospira* through the prism of  
501 genomics. *PLoS Negl Trop Dis.* 2019;13(5):e0007270.
- 502 24. Ko AI, Goarant C, Picardeau M. *Leptospira*: the dawn of the molecular genetics era for  
503 an emerging zoonotic pathogen. *Nat Rev Microbiol.* 2009;7(10):736-47.
- 504 25. Thibeaux R, Iraola G, Ferrer I, Bierque E, Girault D, Soupe-Gilbert ME, et al. Deciphering  
505 the unexplored *Leptospira* diversity from soils uncovers genomic evolution to virulence. *Microb*  
506 *Genom.* 2018;4(1).
- 507 26. Stone NE, Hall CM, Ortiz M, Hutton SM, Santana-Propper E, Celona KR, et al. Diverse  
508 lineages of pathogenic *Leptospira* species are widespread in the environment in Puerto Rico,  
509 USA. *PLoS Negl Trop Dis.* 2022;16(5):e0009959.
- 510 27. Bierque E, Thibeaux R, Girault D, Soupe-Gilbert ME, Goarant C. A systematic review of  
511 *Leptospira* in water and soil environments. *PLoS One.* 2020;15(1):e0227055.
- 512 28. Guernier V, Allan KJ, Goarant C. Advances and challenges in barcoding pathogenic and  
513 environmental *Leptospira*. *Parasitology.* 2018;145(5):595-607.
- 514 29. Sato Y, Mizuyama M, Sato M, Minamoto T, Kimura R, Toma C. Environmental DNA  
515 metabarcoding to detect pathogenic *Leptospira* and associated organisms in leptospirosis-  
516 endemic areas of Japan. *Sci Rep.* 2019;9(1):6575.



- 517 30. Casanovas-Massana A, Pedra GG, Wunder EA, Jr., Diggle PJ, Begon M, Ko AI.  
518 Quantification of *Leptospira interrogans* Survival in Soil and Water Microcosms. *Appl Environ*  
519 *Microbiol.* 2018;84(13).  
520 31. Yanagihara Y, Villanueva SYAM, Nomura N, Ohno M, Sekiya T, Handabile C, et al.  
521 *Leptospira* Is an Environmental Bacterium That Grows in Waterlogged Soil. *Microbiology*  
522 *Spectrum.* 2022;10(2):e02157-21.  
523 32. Stoddard RA, Gee JE, Wilkins PP, McCaustland K, Hoffmaster AR. Detection of  
524 pathogenic *Leptospira* spp. through TaqMan polymerase chain reaction targeting the LipL32  
525 gene. *Diagn Microbiol Infect Dis.* 2009;64(3):247-55.  
526 33. Ahmed A, Engelberts MF, Boer KR, Ahmed N, Hartskeerl RA. Development and  
527 validation of a real-time PCR for detection of pathogenic *leptospira* species in clinical materials.  
528 *PLoS One.* 2009;4(9):e7093.  
529 34. Tringe SG, Rubin EM. Metagenomics: DNA sequencing of environmental samples. *Nat*  
530 *Rev Genet.* 2005;6(11):805-14.  
531 35. Verma S, Gazara RK. Next-generation sequencing: an expedition from workstation to  
532 clinical applications. *Translational Bioinformatics in Healthcare and Medicine: Elsevier;* 2021. p.  
533 29-47.  
534  
535  
536  
537  
538



539 **Supplemental files**

540 Supplemental figure 1 A schematic diagram showing soil and water processing

541 1A-Water, and 1B-Soil

542 **S1A**

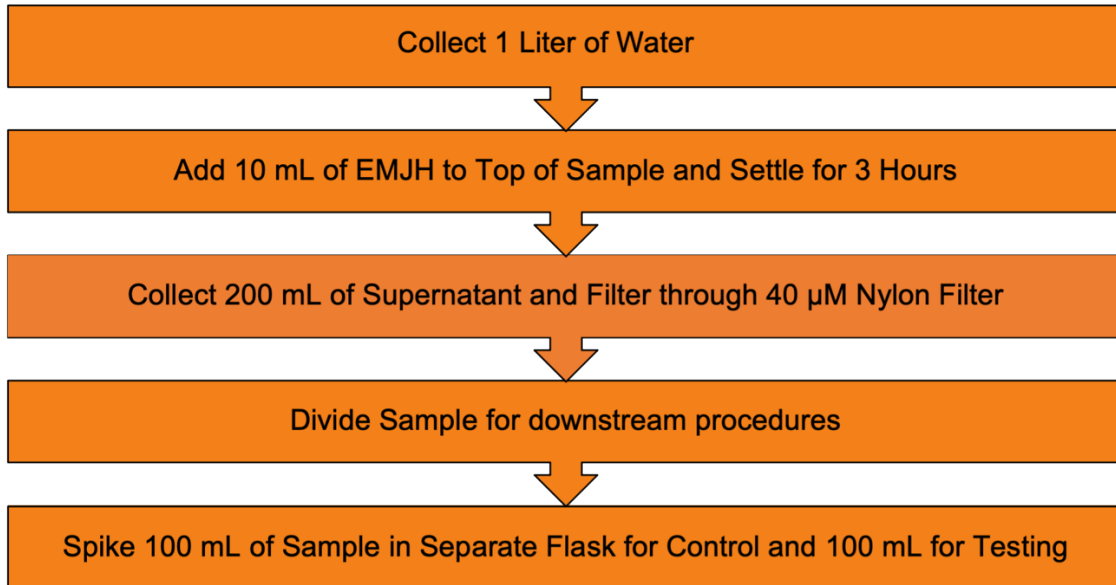

543

544 **S1B**

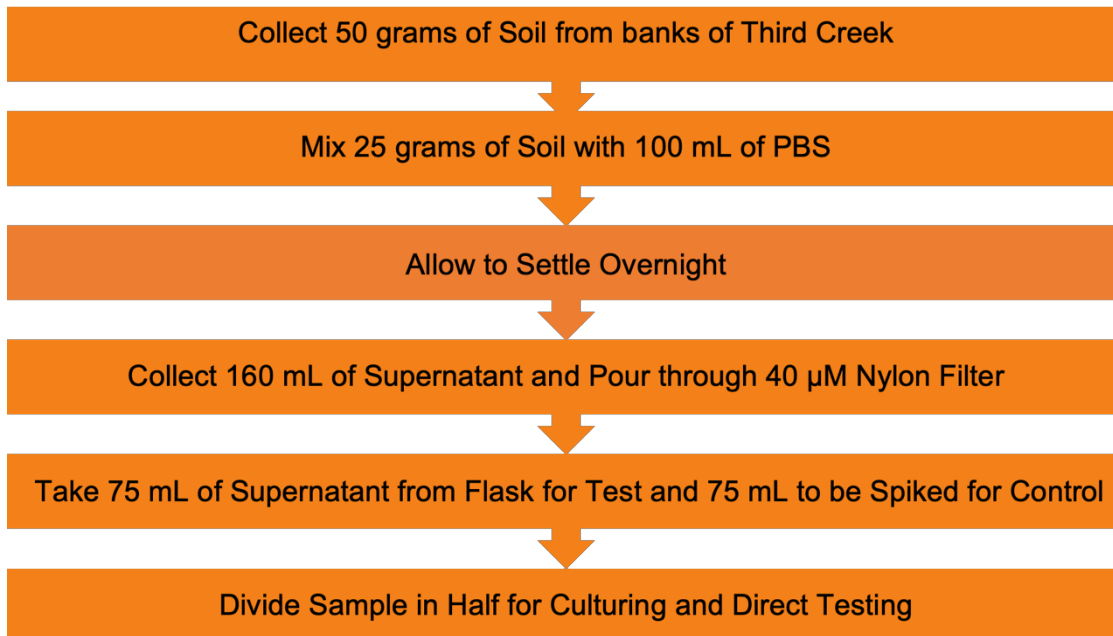

545

546

547  
548  
549

## Supplemental figure 2

550 **Growth of *Leptospira* like organisms in various cultures. The bar charts grouped here**  
551 **represent the levels (0-4) of *Leptospira* growth in water cultures over a period of four**  
552 **weeks. Each bar chart displays the growth for one of the four medias used along with the**  
553 **different selective antimicrobials added to some cultures. (A: EMJH Media, B: Fletcher, C:**  
554 **Korthof, D: Stuart)**

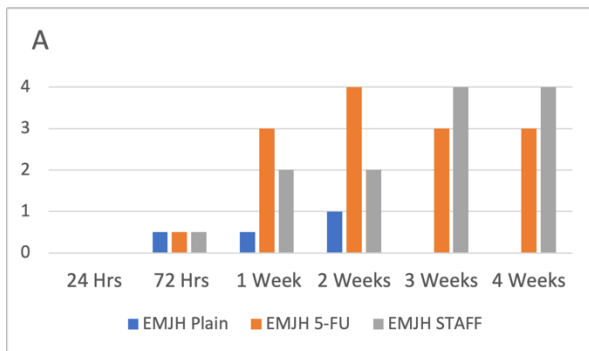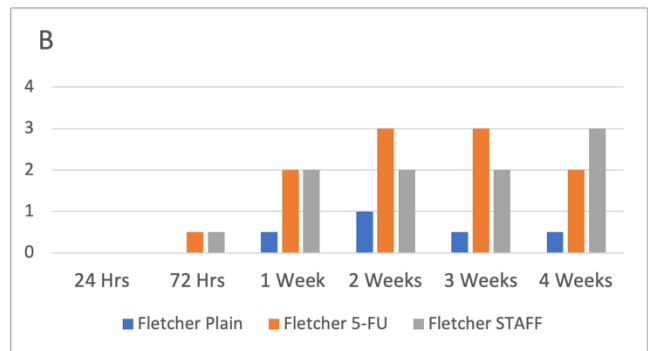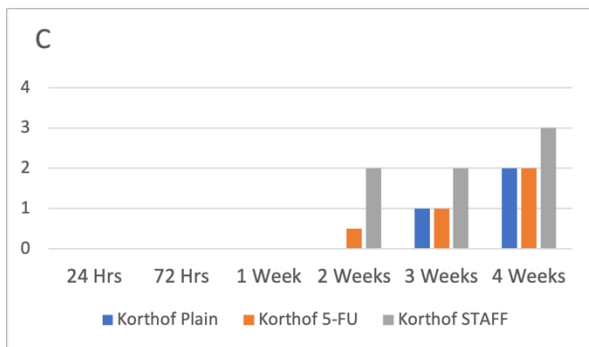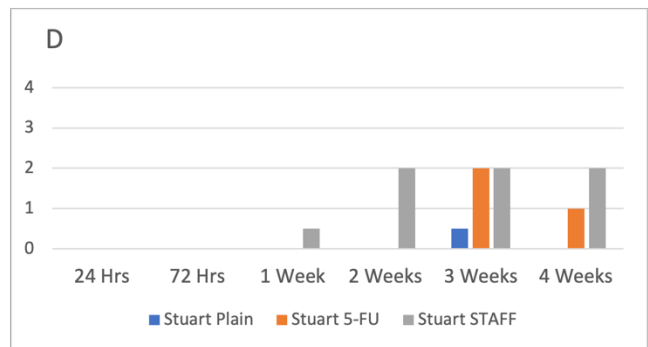

555  
556  
557  
558  
559

560 **Supplemental figure 3 Phylogenetic tree showing position of *Leptospira* Classification from**  
561 ***16S* dataset**  
562 **A-Water samples**

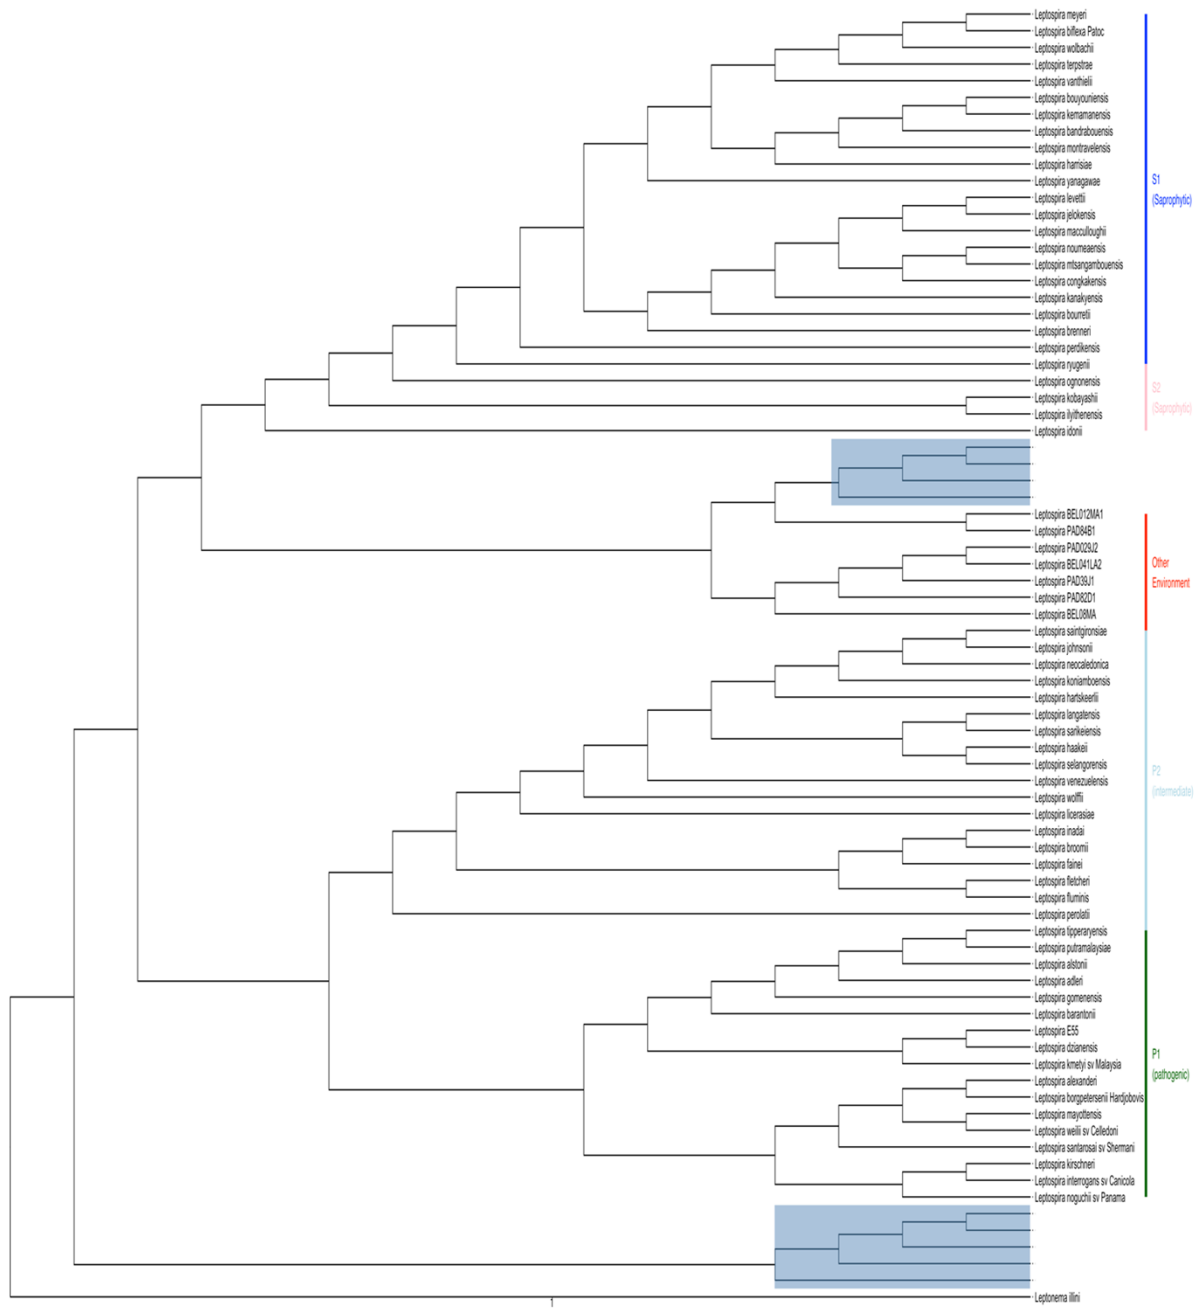

563  
564  
565  
566  
567  
568  
569  
570

571 B-Soil samples

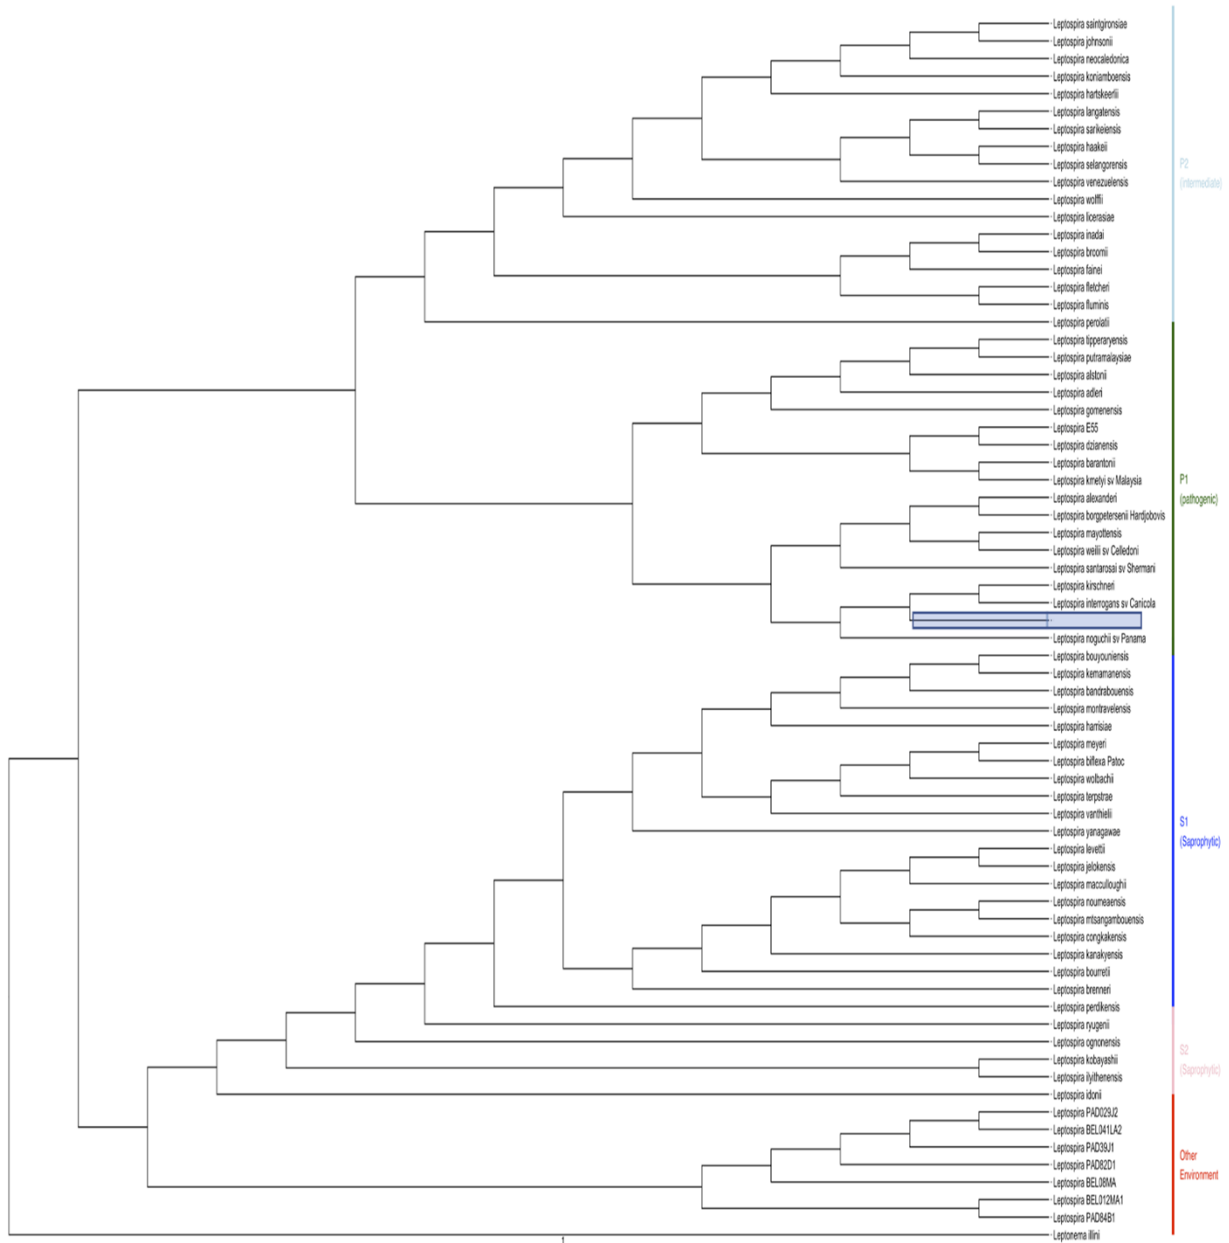

572

# Culturing

Filter Supernatant Through 0.45  $\mu\text{M}$  Filter  
Inoculate Each Media with 500  $\mu\text{L}$  of Filtrate into 4.5 mL of Media

Stuart

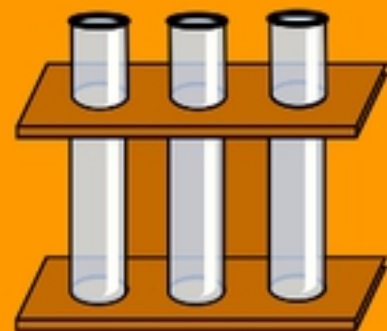

STAFF  
Plain  
5-FU

Korthof

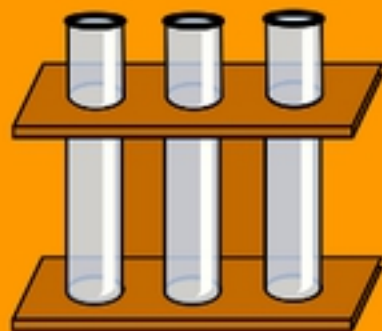

STAFF  
Plain  
5-FU

Fletcher

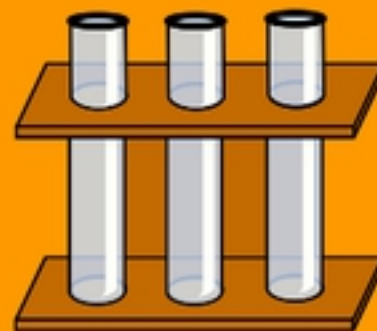

STAFF  
Plain  
5-FU

EMJH

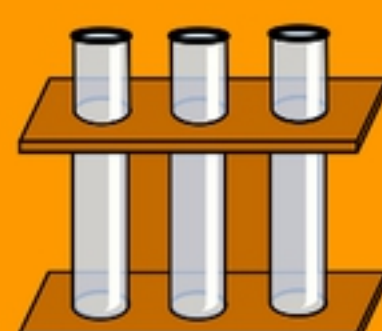

STAFF  
Plain  
5-FU

Figure 1

## Average Cq by Sample Type

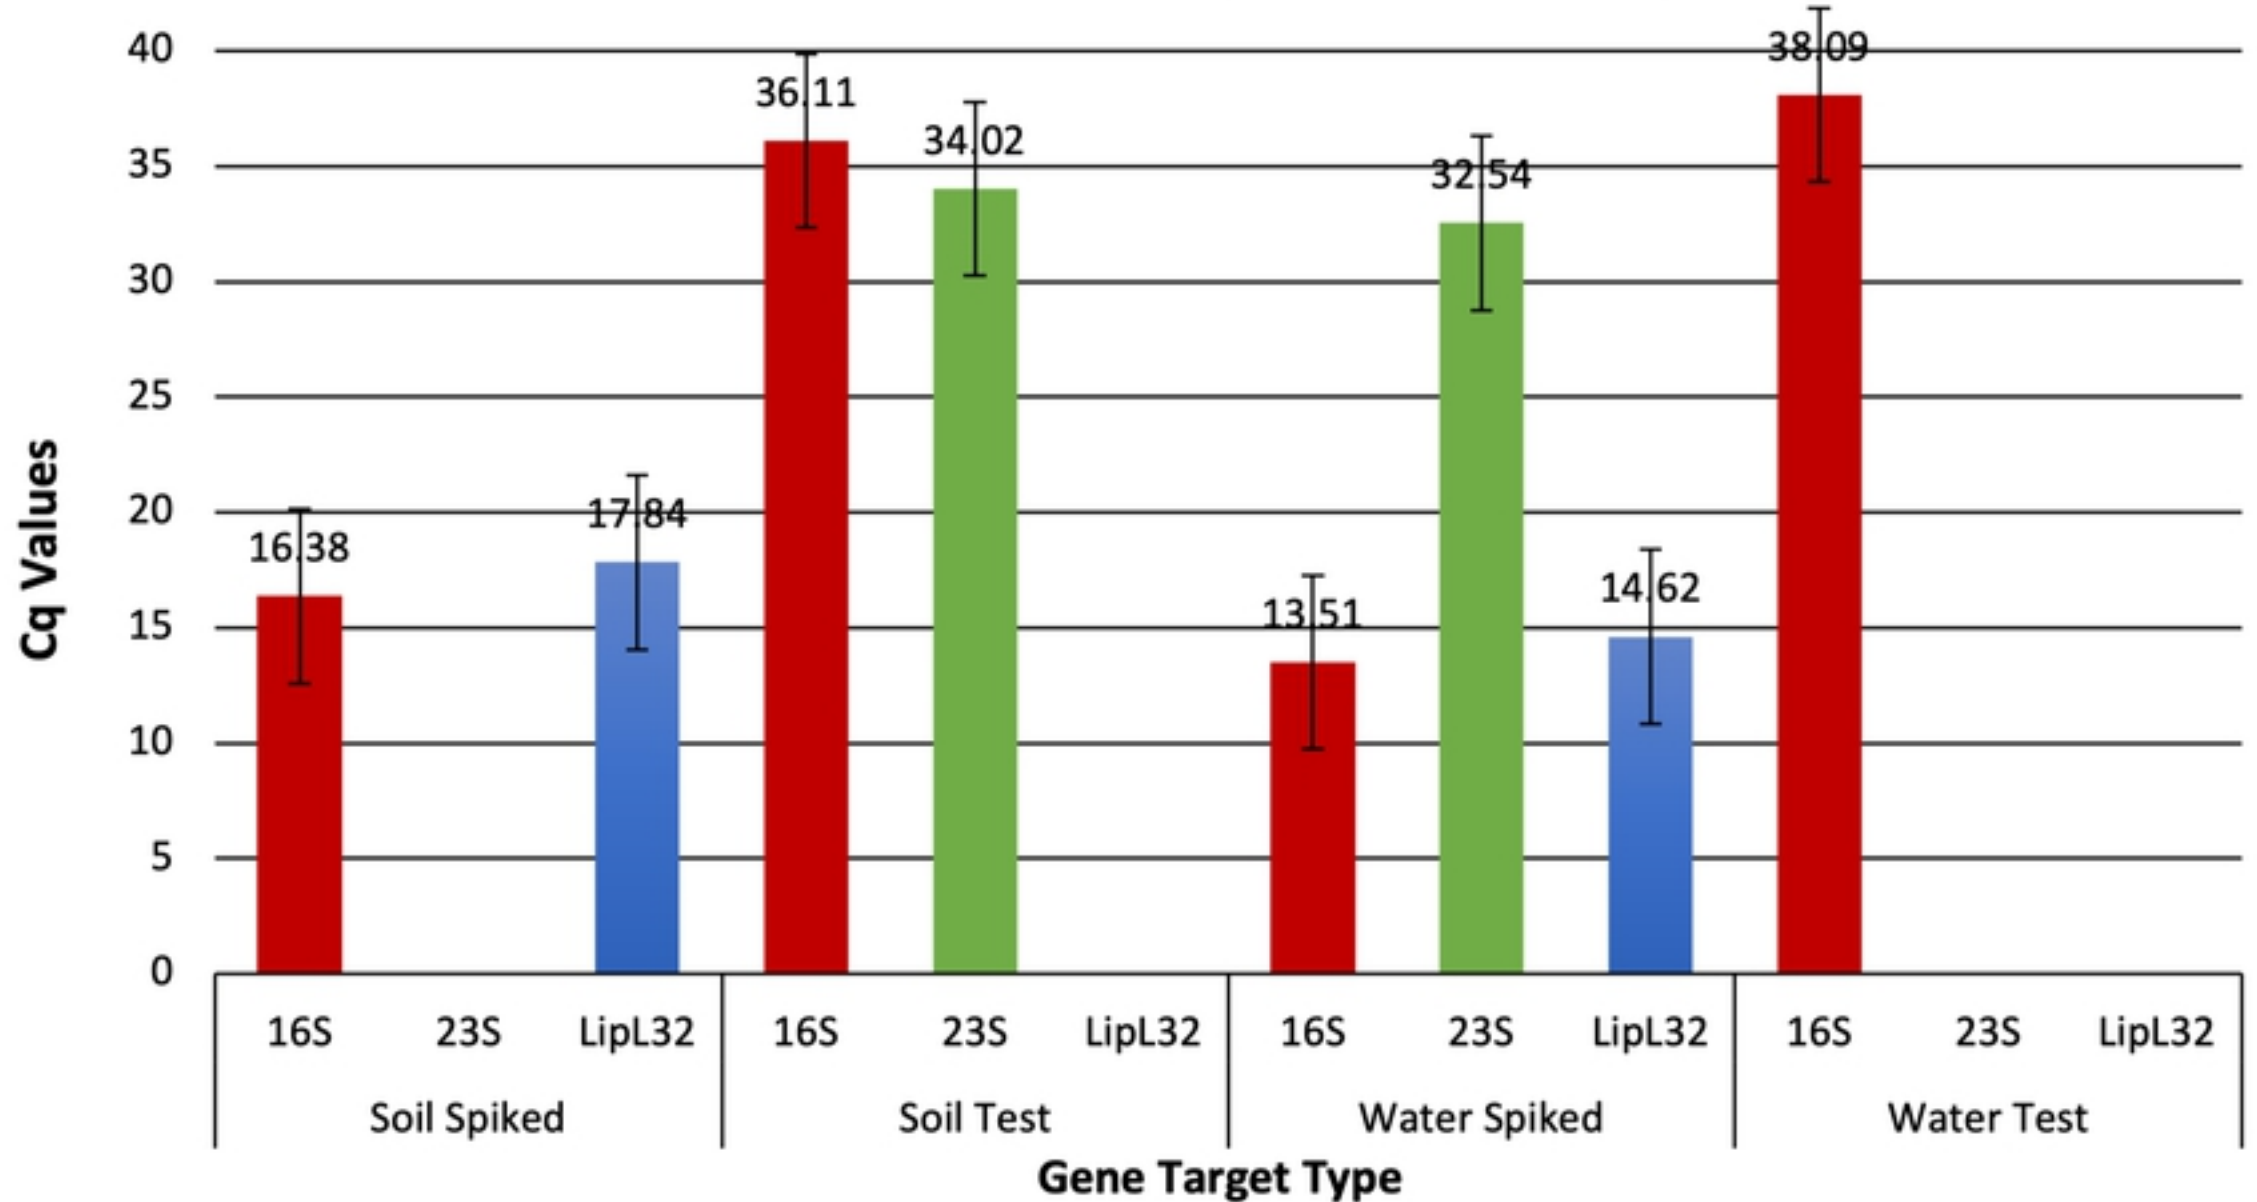

Figure-2

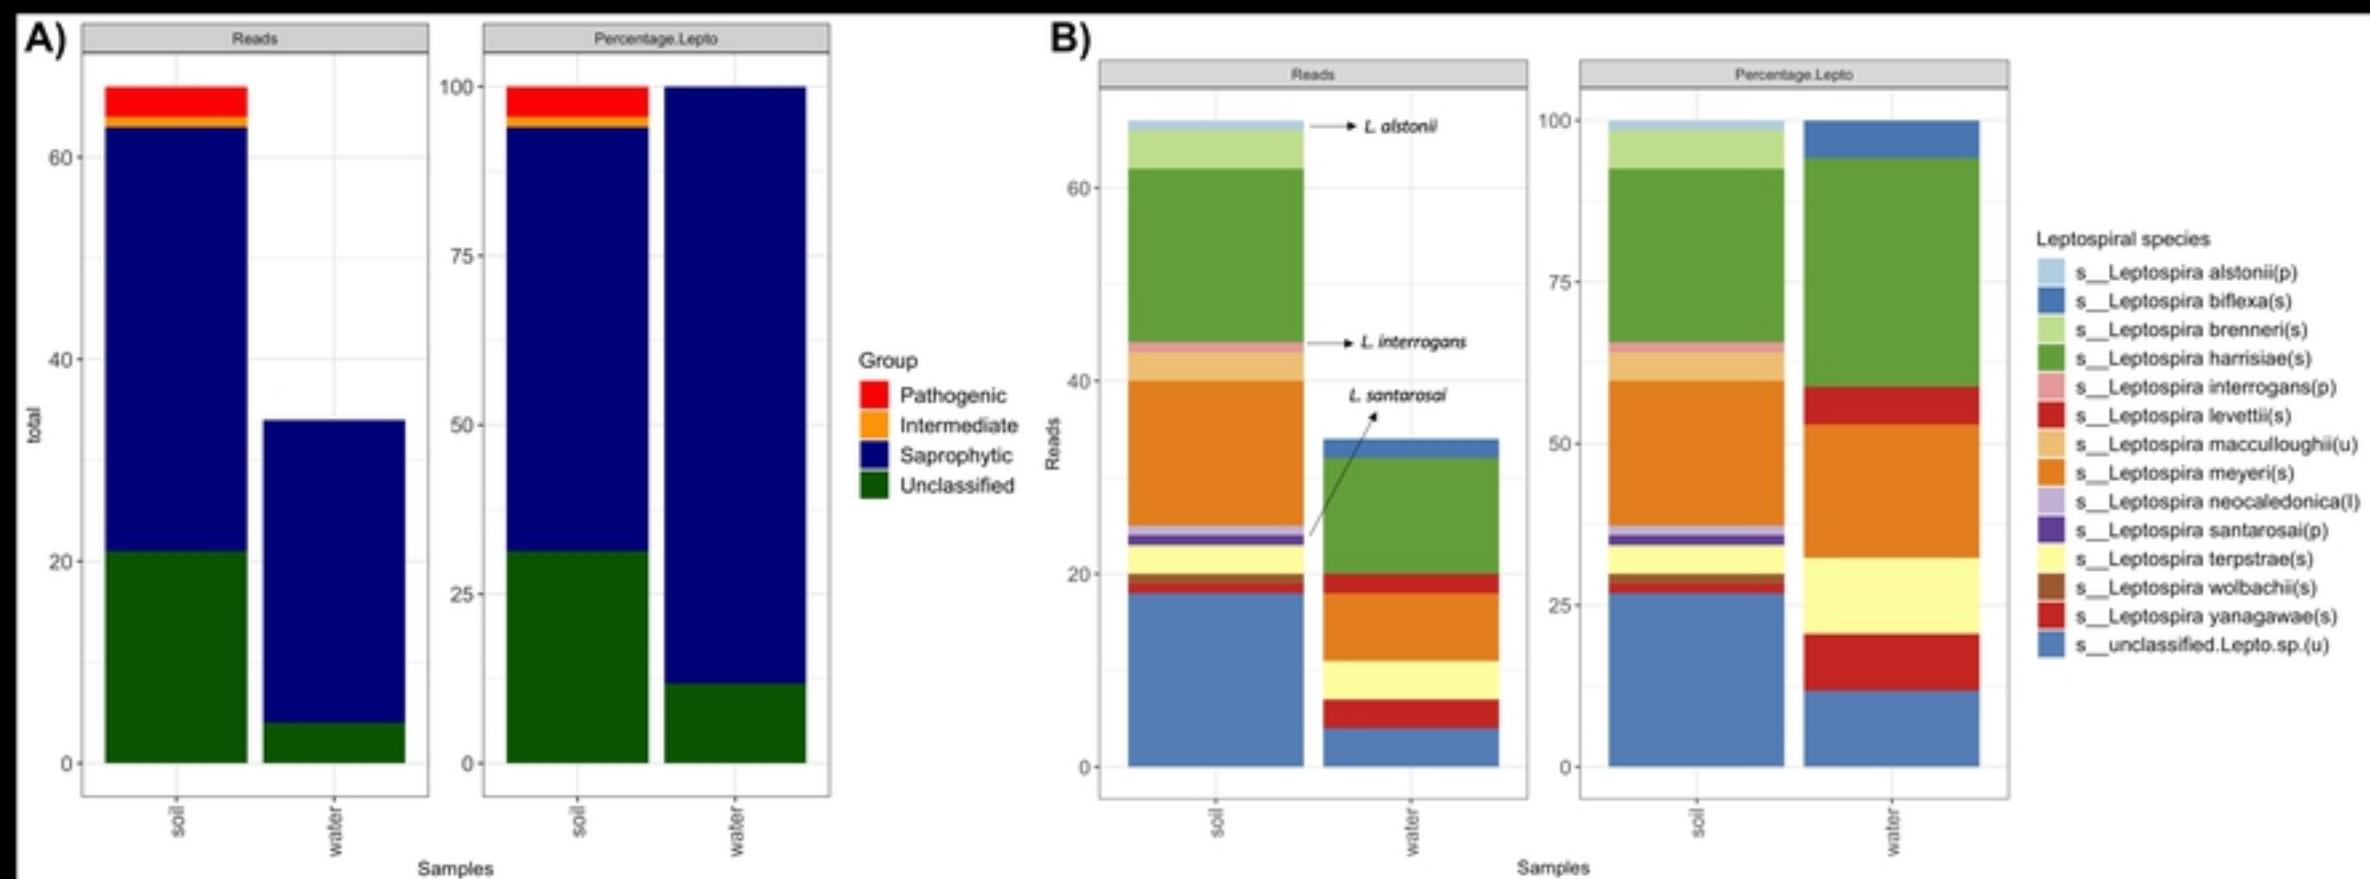

Figure-3

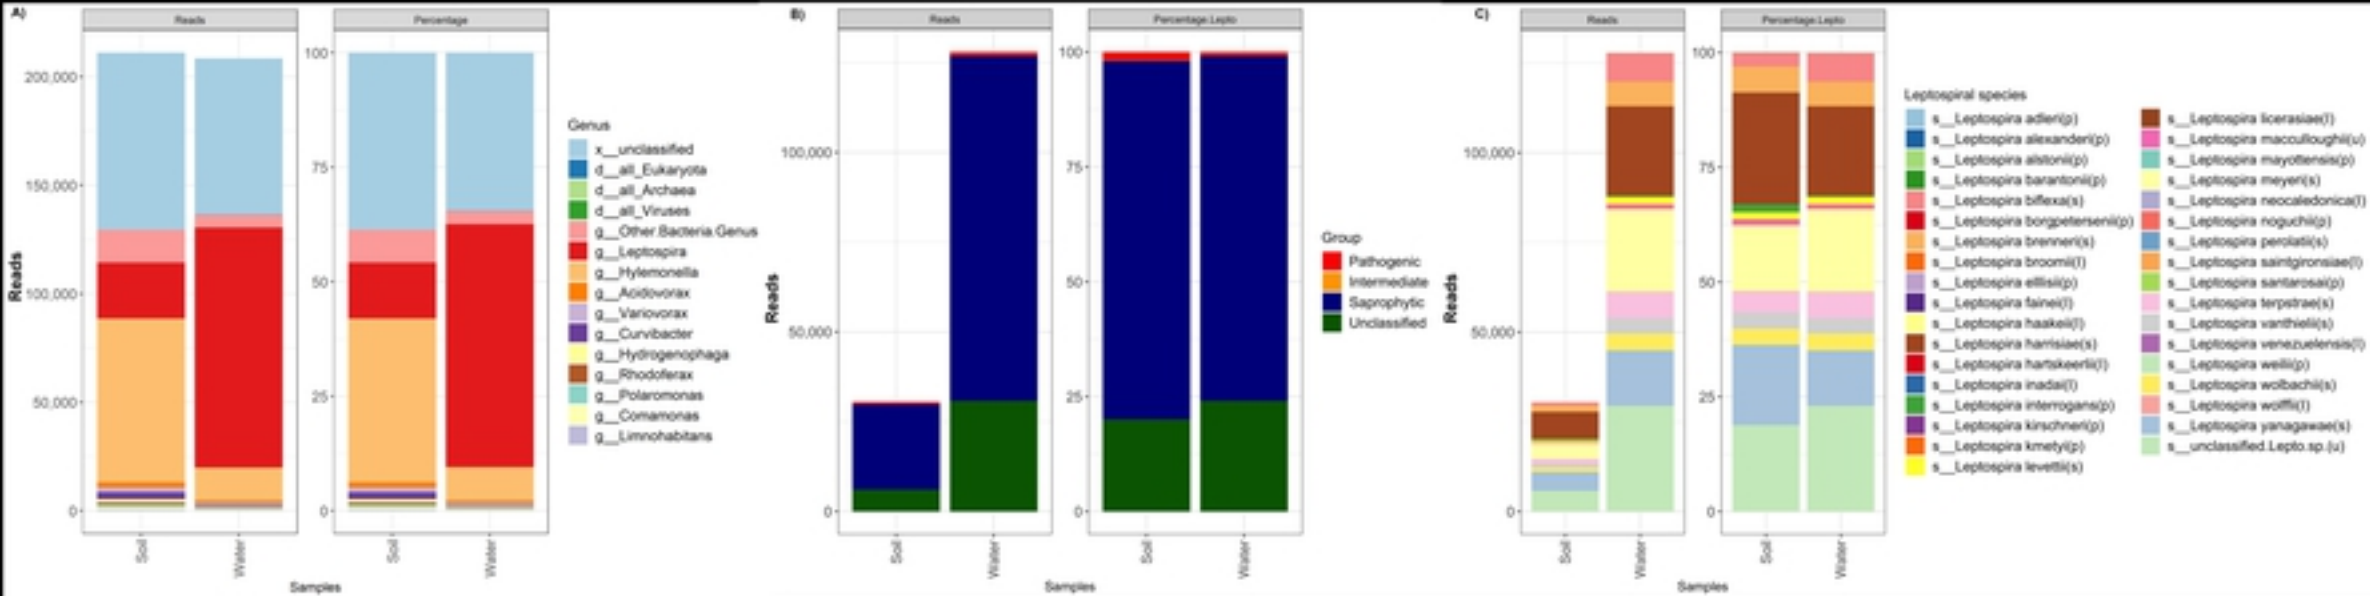

Figure-4
